# Supplementary figures and images for: Ground-covers affect the activity density of ground-dwelling predators and their impact on the Mediterranean fruit fly, Ceratitis capitata
Source: Springer Nature journal article supplement (doi:10.1007/s10526-022-10168-0), 2022-11-12

# Temperature (°C)

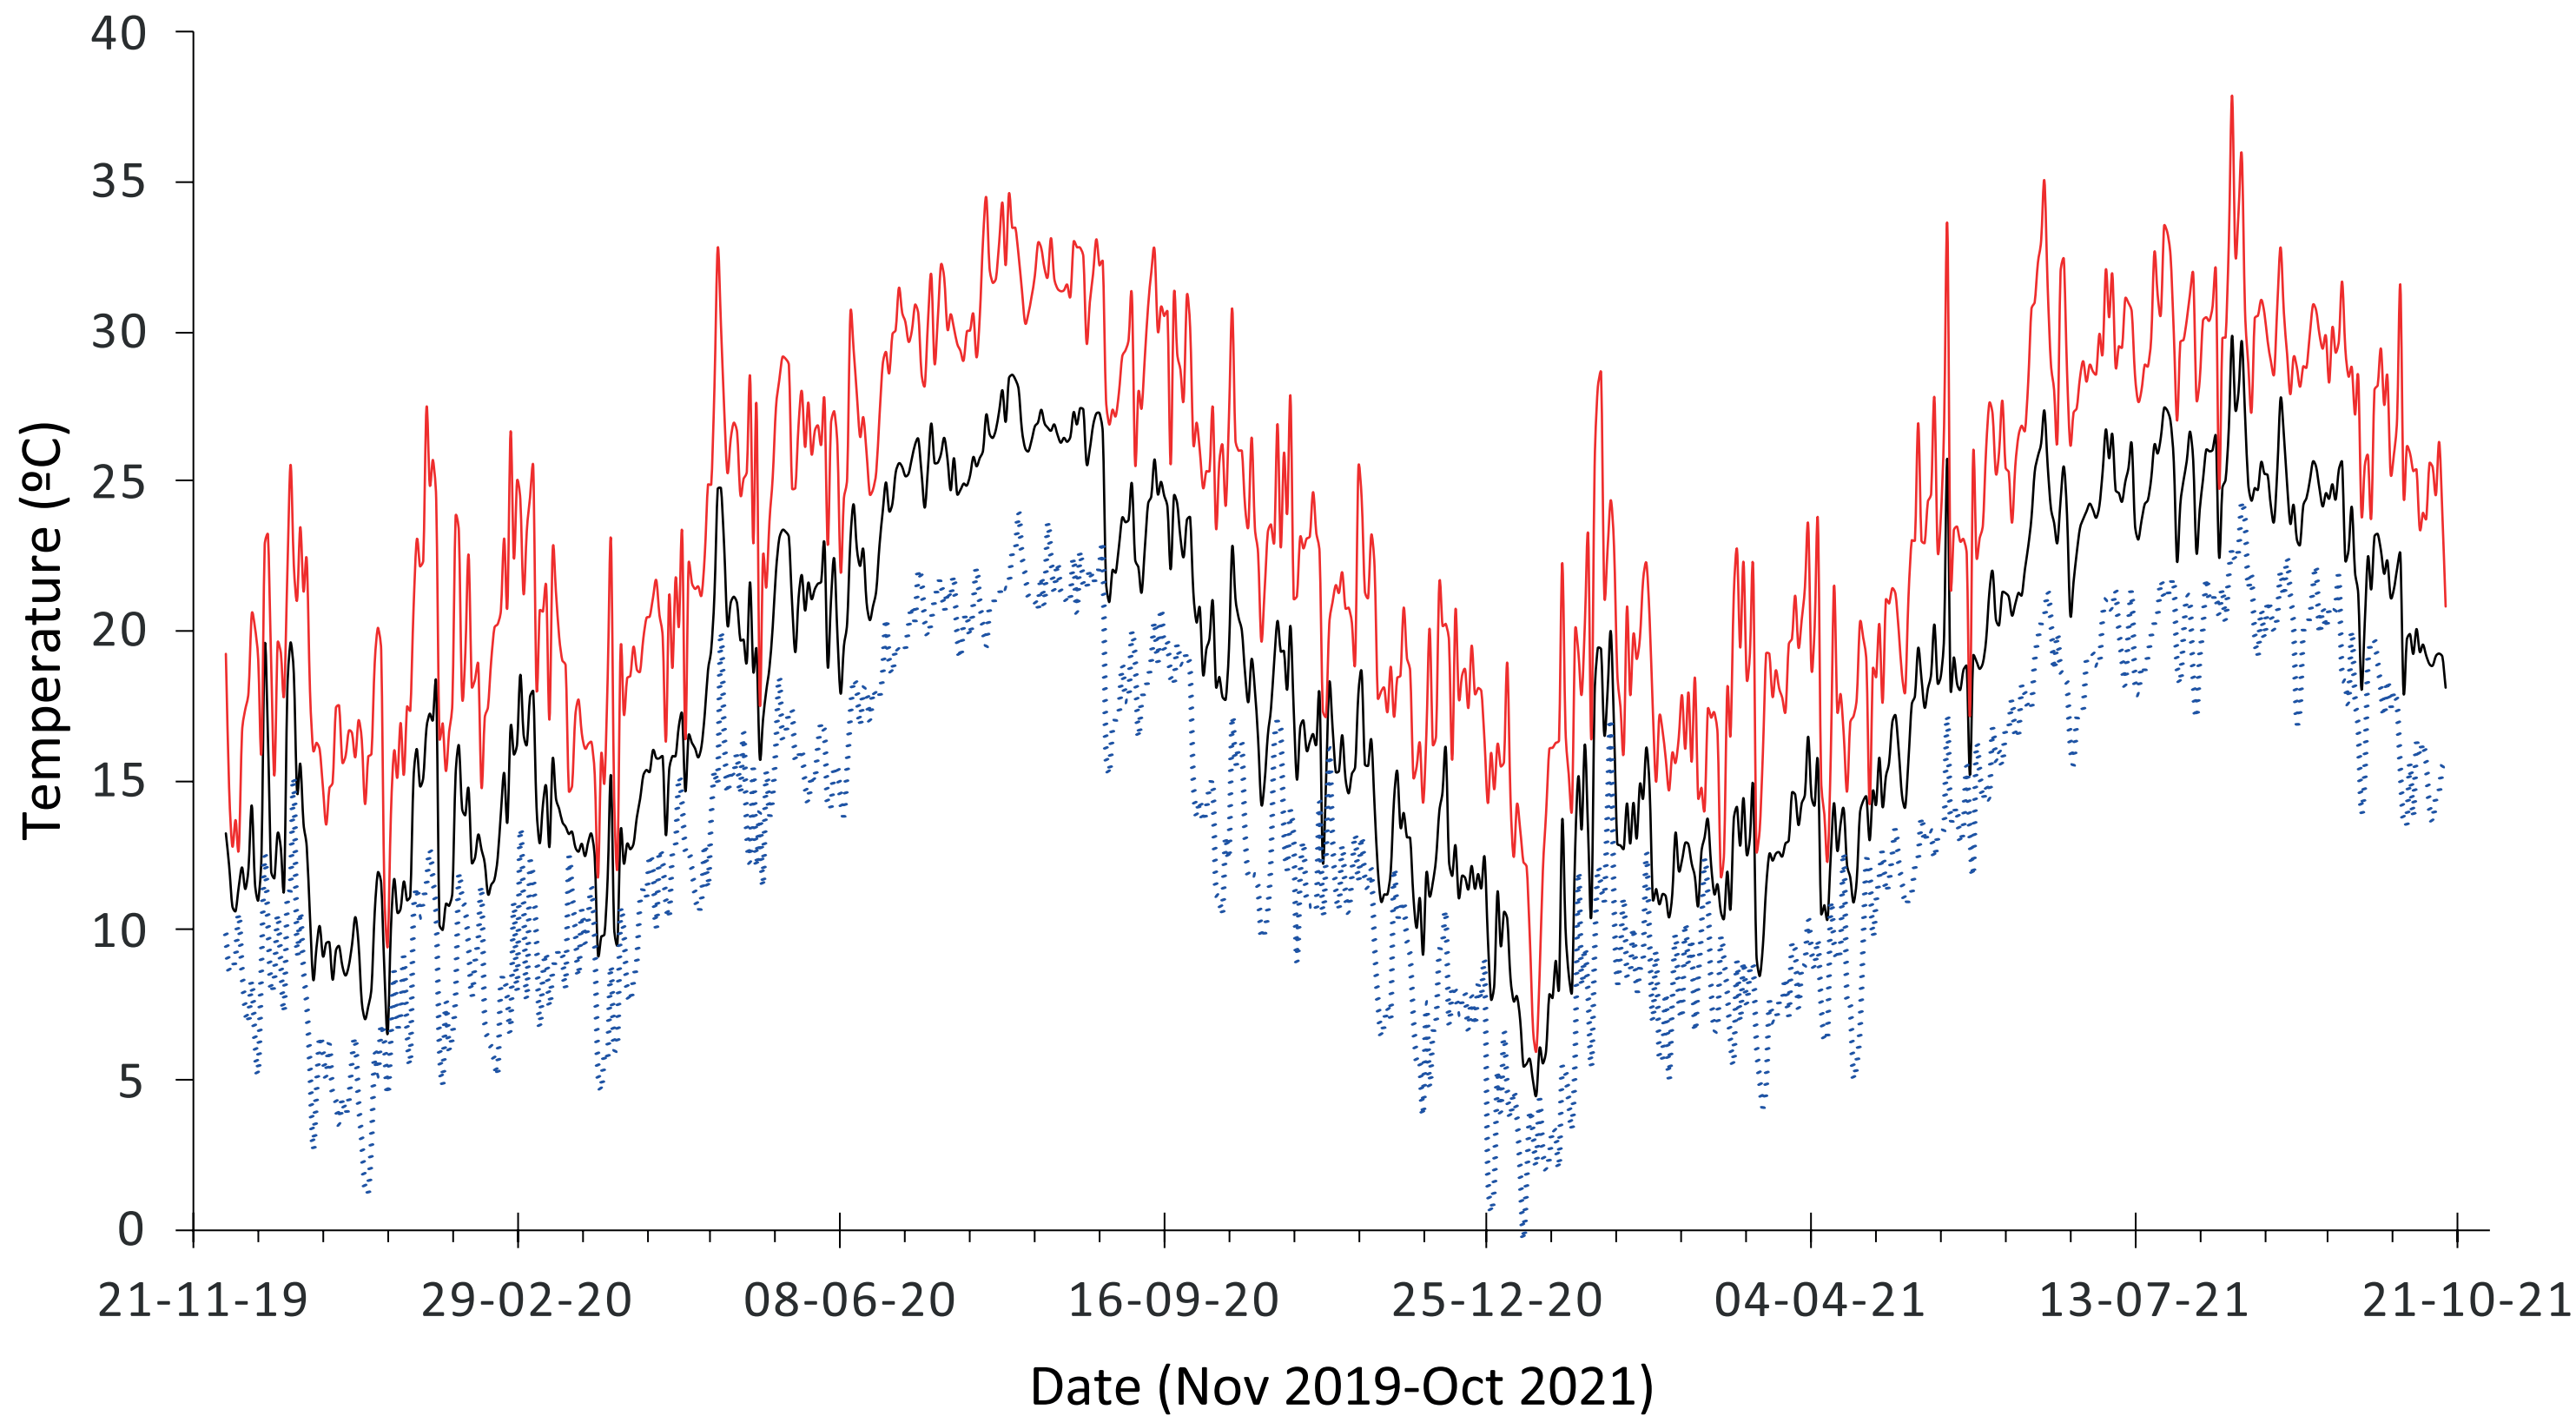

— T    — T max    ..... T min

Supplement: MOESM8 [file 23706828]

# RH (%) and rainfall (mm)

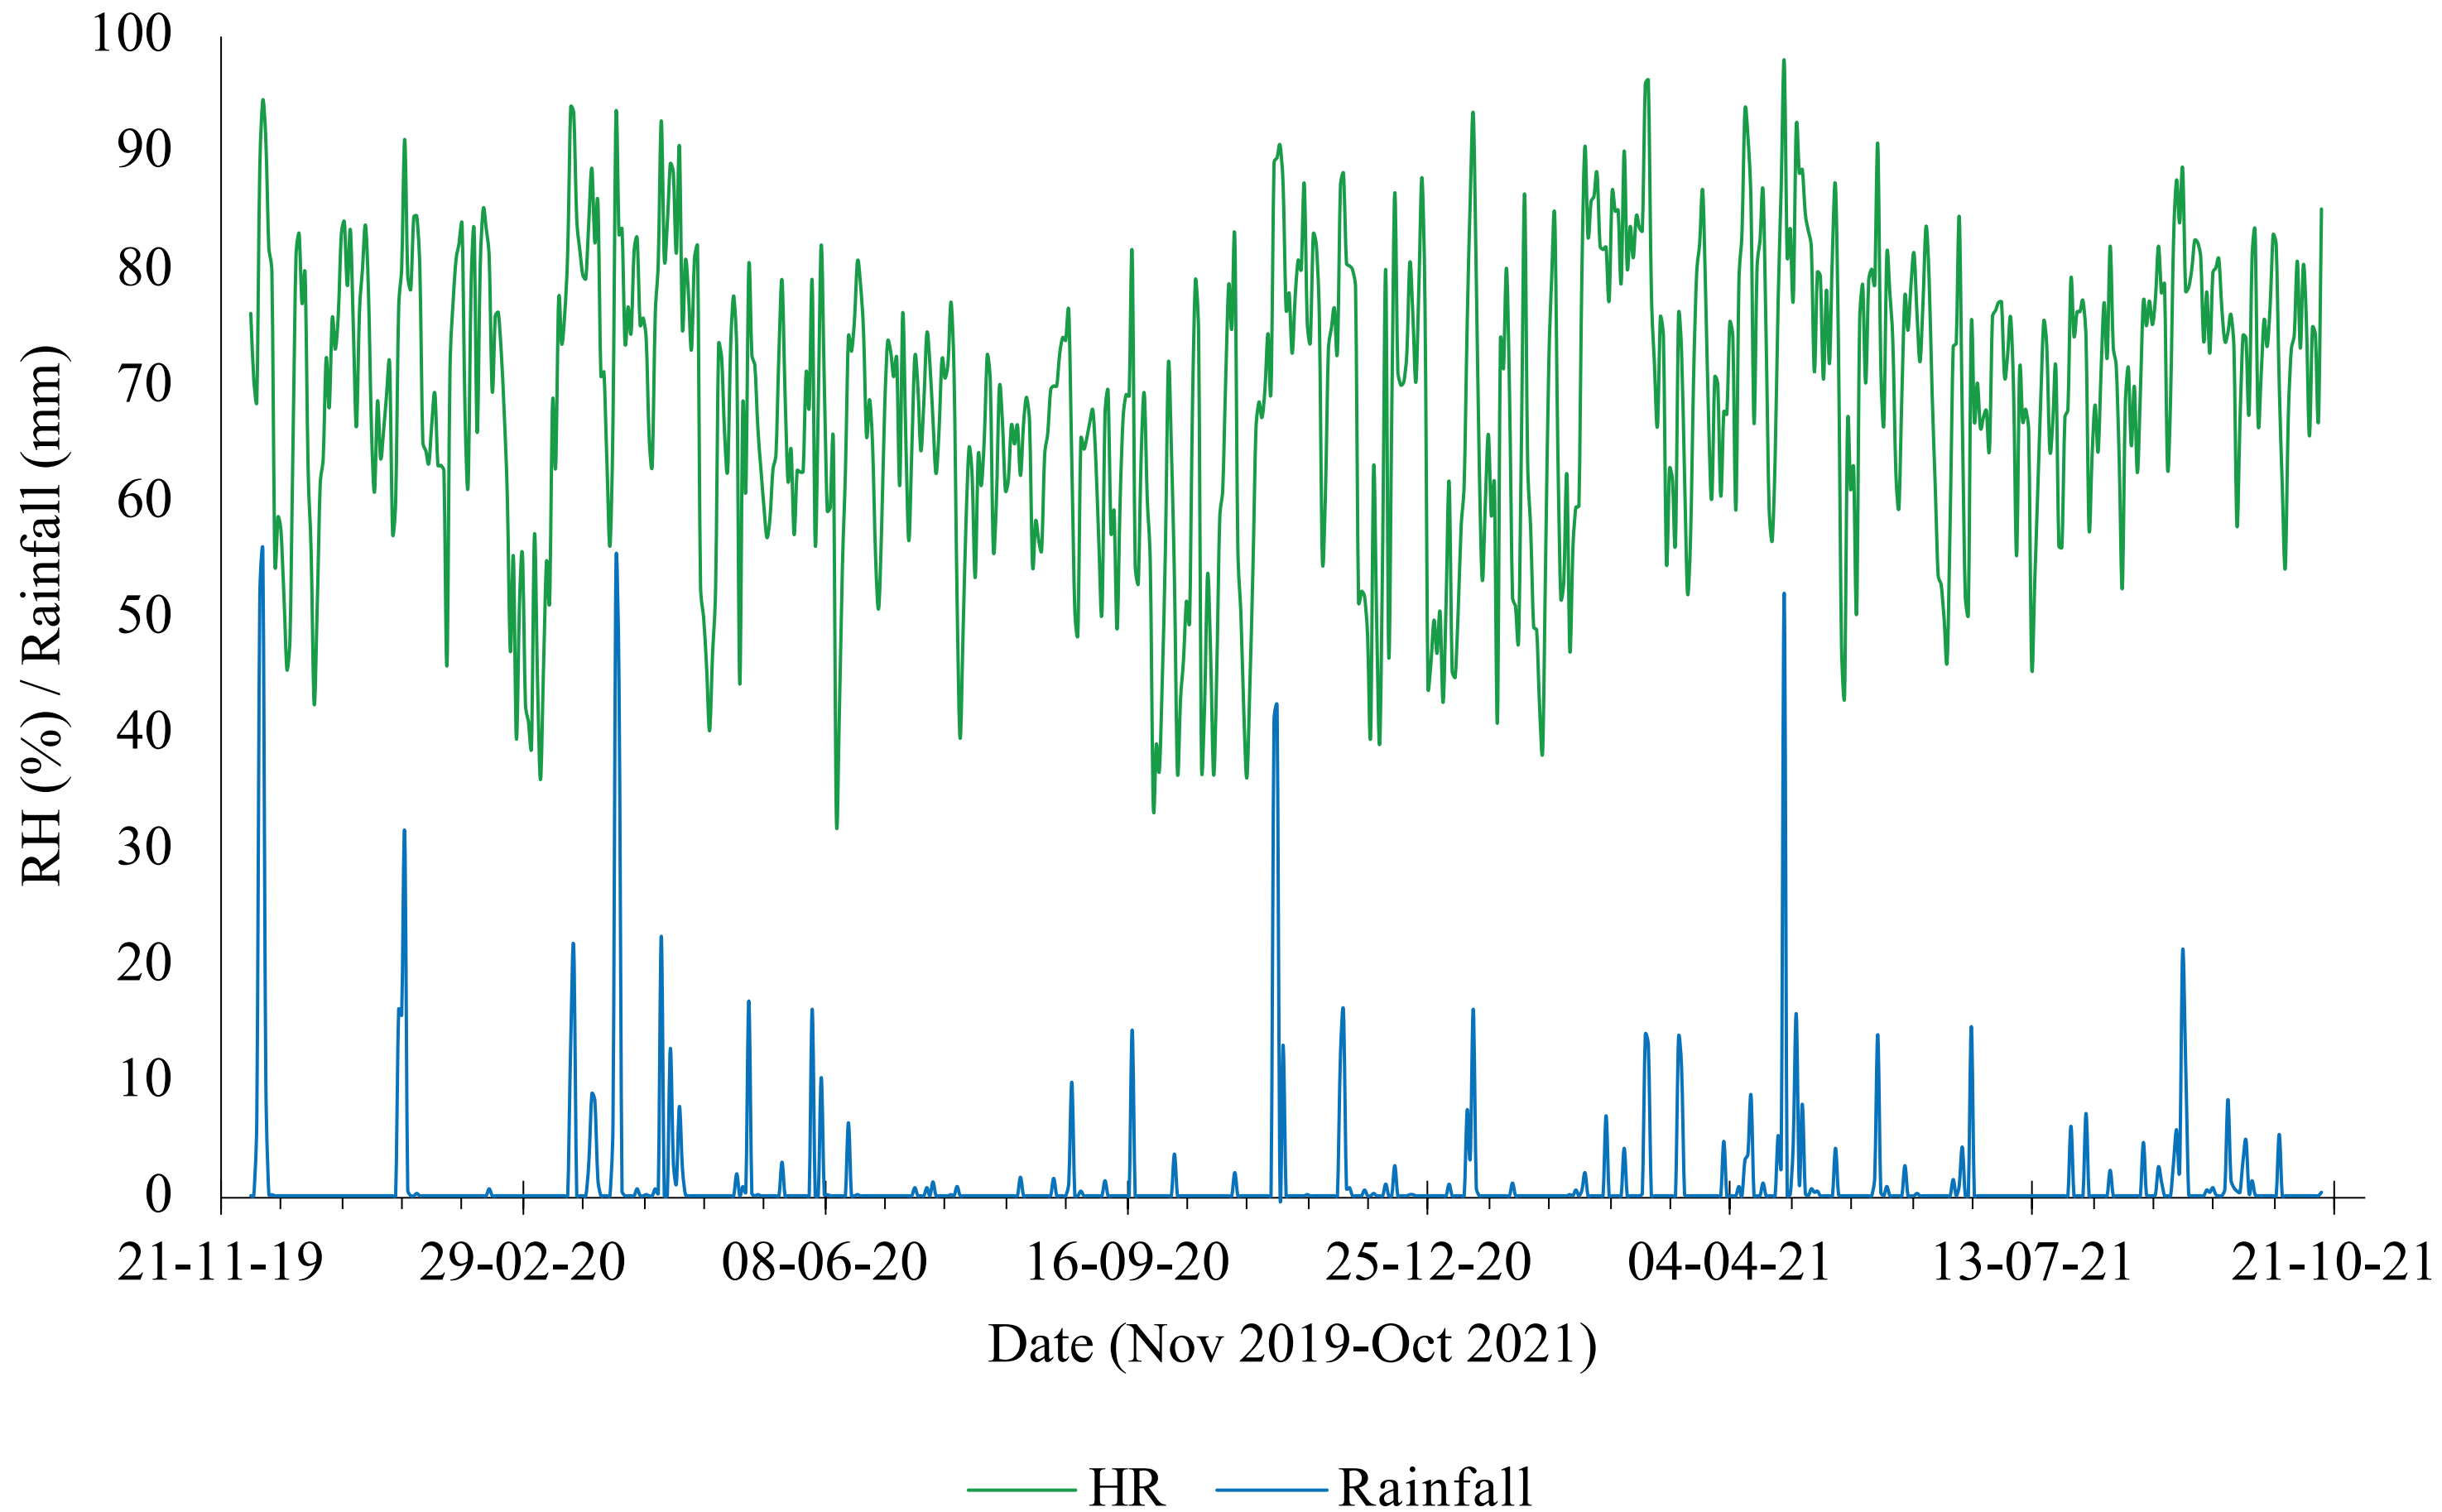

Supplement: MOESM9 [file 23706828]
